# Supplementary material for: A zinc(ii) metal–organic framework with high affinity for CO2 based on triazole and tetrazolyl benzene carboxylic acid
Source: Royal Society of Chemistry journal article supplement (doi:10.1039/c9ce00513g), 2019-01-01
Supplement: c9ce00513g1.pdf [file c9ce00513g1.pdf]

## Electronic supplementary information

### A zinc(II) metal–organic framework with high affinity for CO<sub>2</sub> based on triazole and tetrazolyl benzene carboxylic acid

Donghai Sheng,\* Ying Zhang,\* Yang Han, Guang Xu, Qingxiang Song, Yanping Hu, Xiangyun Liu, Dongming Shan and Aichao Cheng

The State Key Laboratory of Heavy Oil Processing, China University of Petroleum, Changping District, Beijing 102249, P. R. China. Tel:+8610-89733200, E-mail addresses: shengdonghai120@163.com. (Sheng, D. H.); y.zhang@cup.edu.cn (Zhang, Y.).

### Contents

**Fig. S1.** (a) HNMR of 3,5-dimethyl-4H-1,2,4-triazole (Hdmtrz). (b) HNMR of 4-(1H-tetrazol-5-yl)benzoic acid (H<sub>2</sub>tzba).

**Table S1.** Selected bond lengths [Å] and angles [°] for 1.

**Table S2.** Isothermal adsorption data and calculated value of Q<sub>st</sub>.

**Table S3.** Fitting parameters of DSLF model for CH<sub>4</sub>, CO<sub>2</sub> and N<sub>2</sub> at 298K.

**Fig. S2.** The 1 with channels in the plane of [1 1 0] and this diffraction plane gives the diffraction peak at 2θ = 7.0°.

**Fig. S3.** SEM images of 1 with different magnifications.

**Fig. S4.** The pore size distribution of 1.

**Fig. S5.** CO<sub>2</sub> Compared of simulated isotherm based GCMC and experiments at 195K, 273K and 298 K.

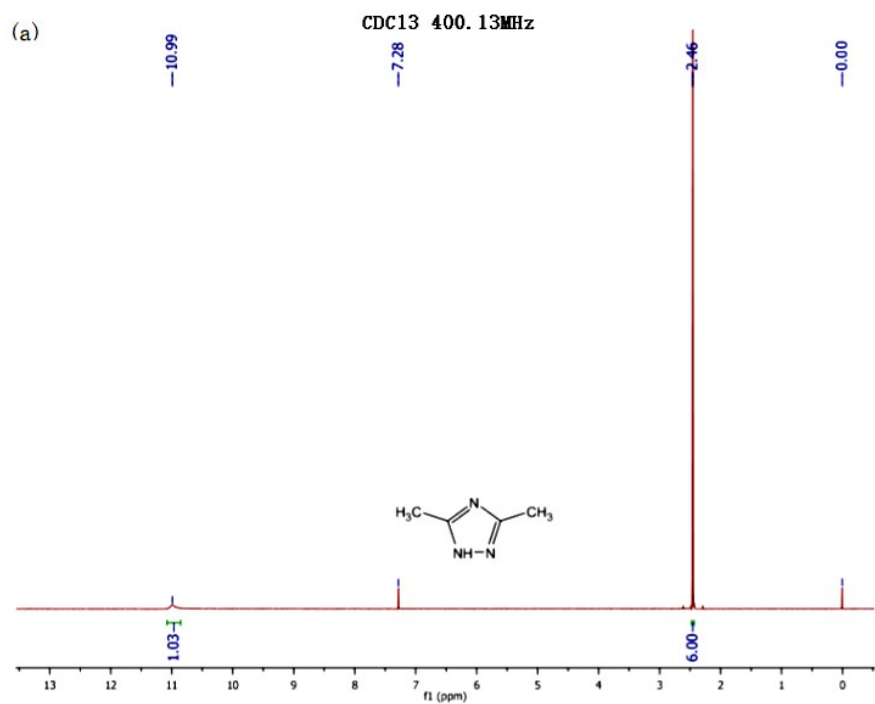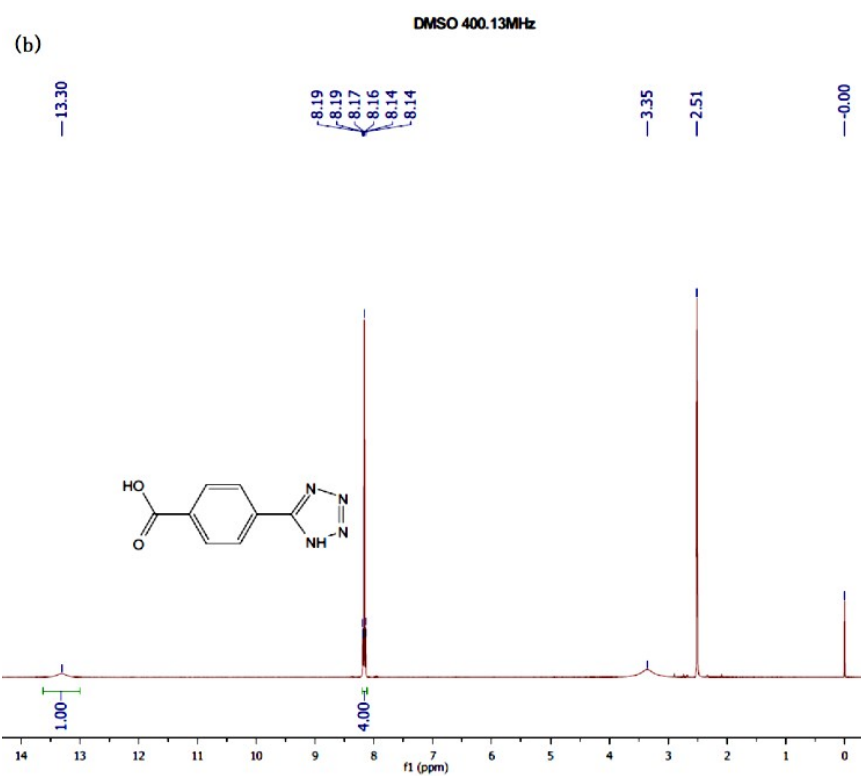

**Fig. S1.** (a)  $^1\text{H}$ NMR of 3,5-dimethyl-4H-1,2,4-triazole (Hdmtrz). (b)  $^1\text{H}$ NMR of 4-(1H-tetrazol-5-yl)benzoic acid (H<sub>2</sub>tzba).

**Table S1.** Selected bond lengths [Å] and angles [°] for 1.

|                                             |          |                                               |          |
|---------------------------------------------|----------|-----------------------------------------------|----------|
| Zn(1)-O(1)                                  | 2.032(3) | Zn(2)-N(1) <sup>ii</sup>                      | 1.982(3) |
| Zn(1)-O(1) <sup>v</sup>                     | 2.032(3) | Zn(2)-N(1) <sup>iii</sup>                     | 1.982(3) |
| Zn(1)-N(5)                                  | 2.033(4) | Zn(2)-N(6) <sup>iv</sup>                      | 1.994(3) |
| Zn(1)-O(2) <sup>i</sup>                     | 2.061(3) | Zn(2)-N(6) <sup>v</sup>                       | 1.389(6) |
| Zn(1)-O(2) <sup>vi</sup>                    | 2.061(3) |                                               |          |
| Zn(1)-O(1) <sup>v</sup> -O(1)               | 90.5(2)  | Zn(2)-N(6) <sup>iv</sup> -N(1) <sup>iii</sup> | 110.9(1) |
| Zn(1)-N(5)-O(1)                             | 103.7(1) | Zn(2)-N(6) <sup>iv</sup> -N(1) <sup>iii</sup> | 107.8(1) |
| Zn(1)-O(2) <sup>i</sup> -O(1) <sup>v</sup>  | 86.7(1)  | Zn(2)-N(1) <sup>iii</sup> -N(1) <sup>ii</sup> | 109.0(2) |
| Zn(1)-O(2) <sup>vi</sup> -O(1) <sup>v</sup> | 157.2(1) | Zn(2)-N(6)-N(1) <sup>iii</sup>                | 107.8(1) |
| Zn(1)-O(2) <sup>i</sup> -N(5)               | 98.87(1) | Zn(2)-N(6)-N(6) <sup>iv</sup>                 | 110.2(1) |

Symmetry codes used for 1: i=-x+1, -y+1, -z+2; ii=-x+1/2, -y+1/2, -z+2; iii=x+1/2, -y+1/2, z+1; iv=-x+1, y, -z+3; v=x, -y+1, z; vi= -x+1, y, -z+2.

**Table S2.** Isothermal adsorption data and calculated value of  $Q_{st}$ .

| T <sub>1</sub> | T <sub>2</sub> | P <sub>1</sub> | P <sub>2</sub> | Amount(cm <sup>3</sup> /g) | Q <sub>st</sub> (KJ/mol) |
|----------------|----------------|----------------|----------------|----------------------------|--------------------------|
| 195            | 273            | 0.00118        | 6.87           | 12.50                      | 49.19                    |
| 195            | 273            | 0.10           | 12.35          | 25.01                      | 27.33                    |
| 195            | 273            | 0.50           | 20.48          | 37.50                      | 21.07                    |
| 195            | 273            | 1.25           | 39.56          | 50.12                      | 19.60                    |
| 195            | 273            | 2.25           | 54.57          | 62.53                      | 18.09                    |
| 195            | 273            | 4.23           | 87.71          | 75.62                      | 17.16                    |
| 195            | 273            | 6.87           | 106.16         | 87.53                      | 16.64                    |
| 195            | 273            | 9.53           | 140.26         | 100.07                     | 16.32                    |
| 195            | 298            | 0.00118        | 20.00          | 12.53                      | 45.67                    |
| 195            | 298            | 0.10           | 25.16          | 25.14                      | 25.93                    |
| 195            | 298            | 0.50           | 69.42          | 37.57                      | 23.14                    |
| 195            | 298            | 1.25           | 114.29         | 50.31                      | 21.18                    |
| 195            | 298            | 2.25           | 171.53         | 62.53                      | 20.32                    |
| 195            | 298            | 4.23           | 243.61         | 75.06                      | 18.97                    |
| 195            | 298            | 6.87           | 306.96         | 87.53                      | 17.81                    |
| 195            | 298            | 9.53           | 359.34         | 100.14                     | 17.02                    |

**Table S3.** Fitting parameters of DSLF model for CH<sub>4</sub> and CO<sub>2</sub> at 298K.

| Adsorbent       | Temperature / K | q <sub>c</sub> / mmol/g | q <sub>i</sub> / mmol/g | K <sub>c</sub> | K <sub>i</sub> | R <sup>2</sup> |
|-----------------|-----------------|-------------------------|-------------------------|----------------|----------------|----------------|
| CO <sub>2</sub> | 298             | 0.0274                  | 7.1574                  | -0.0426        | 0.0263         | 0.9999         |
| CH <sub>4</sub> | 298             | 0.0085                  | 0.4769                  | -0.0426        | 0.0081         | 0.9999         |
| N <sub>2</sub>  | 298             | 0.0086                  | 1.5853                  | 0.0019         | 0.0085         | 0.9999         |

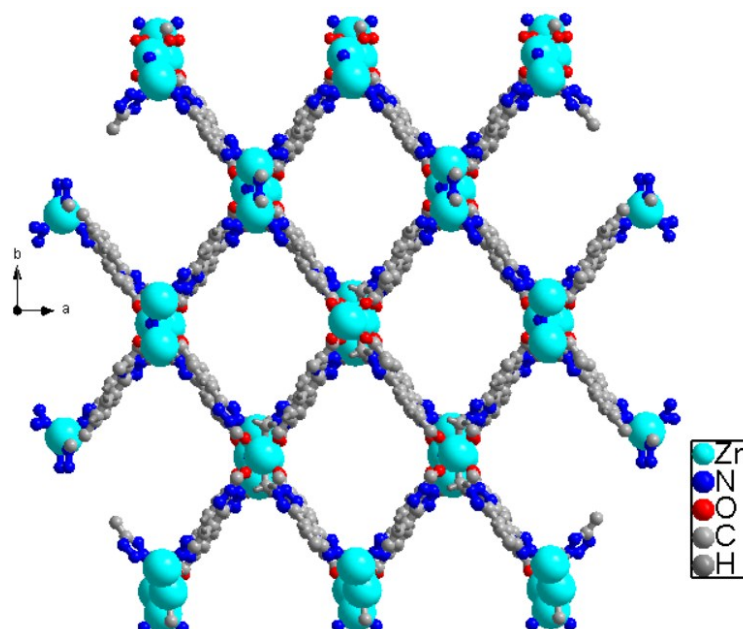

**Fig. S2.** The 1 with channels in the plane of [1 1 0] and this diffraction plane gives the diffraction peak at  $2\theta = 7.0^\circ$ .

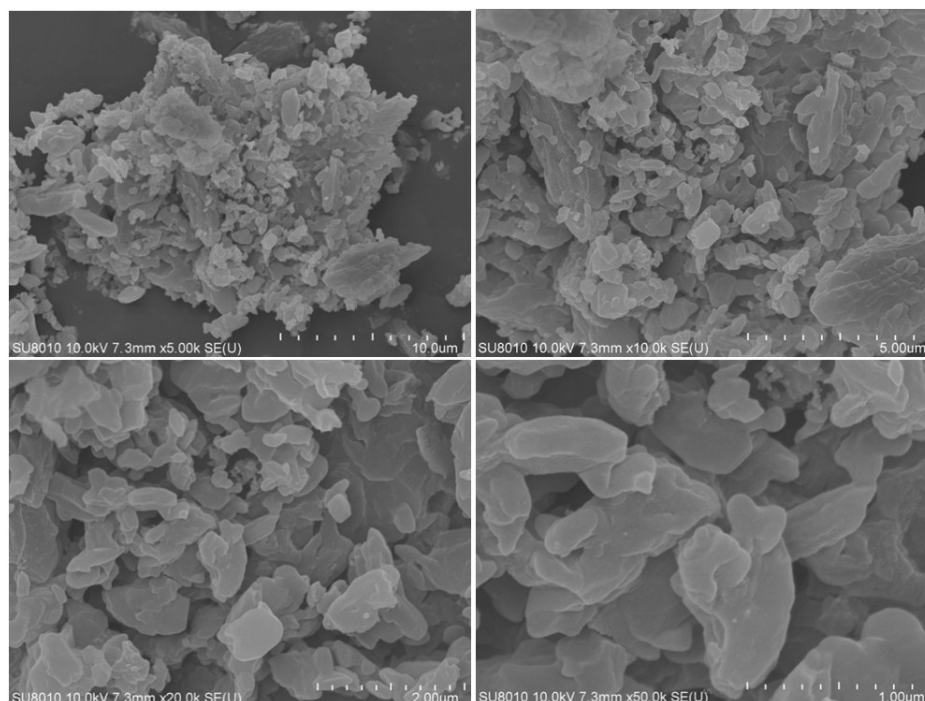

**Fig. S3.** SEM images of 1 with different magnifications.

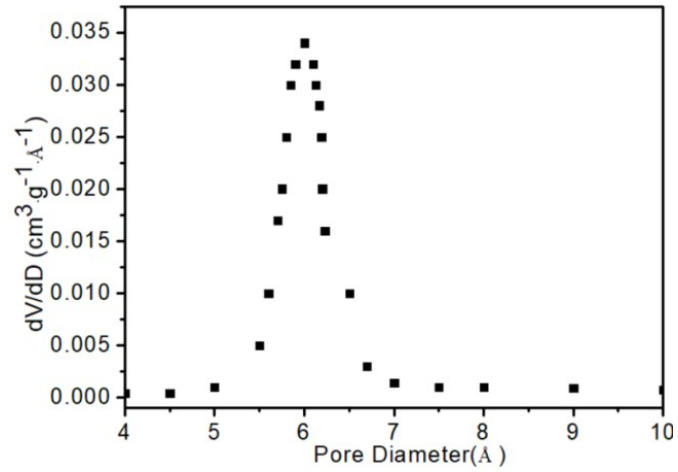

Fig. S4. The pore sizedistribution of 1.

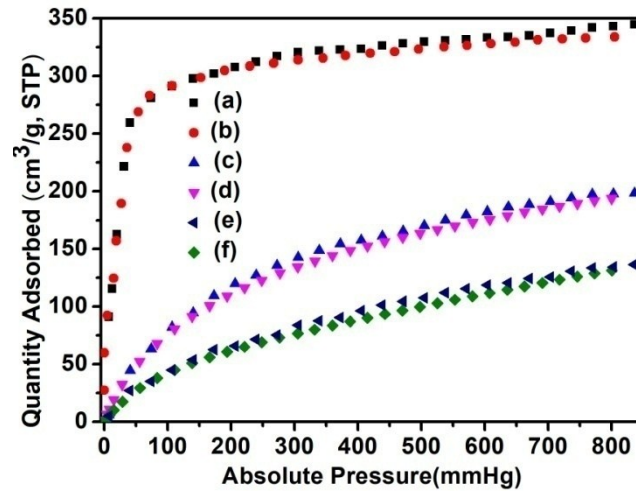

Fig. S5. CO<sub>2</sub> adsorption isotherms based on GCMC and experiments at 195K, 273K and 298 K. (a) Simulated ads. CO<sub>2</sub> at 195K. (b) Experimental ads. CO<sub>2</sub> at 195K. (c) Simulated ads. CO<sub>2</sub> at 273K. (d) Experimental ads. CO<sub>2</sub> at 273K. (e) Simulated ads. CO<sub>2</sub> at 298K. (f) Experimental ads. CO<sub>2</sub> at 298K.
